# Supplementary material for: The Effect of a Diabetes-Specific Cognitive Behavioral Treatment Program (DIAMOS) for Patients With Diabetes and Subclinical Depression: Results of a Randomized Controlled Trial
Source: Oxford University Press journal article supplement (doi:10.2337/dc14-1416), 2015-01-20
Supplement: dc141416supplementarydata.pdf [file dc141416supplementarydata.pdf]

SUPPLEMENTARY DATA

**Supplementary Table 1. Contents and treatment procedures in the DIAMOS and control groups**

| Session<br>(90 min<br>each) | DIAMOS                                                                                                                                                                                                                                                                                                                                                                                               | Control group                                                                                                                                                                                                                                                                       |
|-----------------------------|------------------------------------------------------------------------------------------------------------------------------------------------------------------------------------------------------------------------------------------------------------------------------------------------------------------------------------------------------------------------------------------------------|-------------------------------------------------------------------------------------------------------------------------------------------------------------------------------------------------------------------------------------------------------------------------------------|
| 1                           | <ul style="list-style-type: none"> <li>• Introduction/ group formation</li> <li>• Overview of contents</li> <li>• Analysis and definition of diabetes-specific/generic problems and distresses</li> <li>• Explanatory distress model: distresses versus resources</li> </ul> <hr/> <p>After lesson task: Development of personal distress model in the DIAMOS booklet</p>                            | <ul style="list-style-type: none"> <li>• Getting to know/ group formation</li> <li>• Diabetes education: carbohydrate estimation; bolus calculation; insulin injection; glycaemic goal setting; prevention of hypoglycaemic attacks/ketoacidosis</li> </ul>                         |
| 2                           | <ul style="list-style-type: none"> <li>• Revision</li> <li>• Selection of main distresses</li> <li>• Introduction of problem solving versus emotional adaption</li> <li>• Diabetes-specific problem-solving interventions</li> <li>• Generic problem-solving interventions</li> </ul> <hr/> <p>After lesson task: Transfer and recording of worked out personal strategies in the DIAMOS booklet</p> | <ul style="list-style-type: none"> <li>• Diabetes education: diabetes long-term complications and collateral diseases, hypertension, metabolic syndrome, cardiovascular risk factors, smoking, alcohol, prevention of complications and adequate health care and control</li> </ul> |
| 3                           | <ul style="list-style-type: none"> <li>• Revision</li> <li>• Introduction of functional versus dysfunctional beliefs/attitudes</li> <li>• Restructuring of diabetes-specific dysfunctional attitudes</li> <li>• Diabetes-related acceptance and commitment training</li> </ul> <hr/> <p>After lesson task: Recording of developed functional attitudes in the DIAMOS booklet</p>                     | <ul style="list-style-type: none"> <li>• Diabetes education: appropriate versus suboptimal foods/diet, dietary behavior and glycemic control, carbs, albumins, and fats, adipose tissue and insulin sensitivity, vitamins, cooking recommendations and recipes</li> </ul>           |
| 4                           | <ul style="list-style-type: none"> <li>• Revision</li> <li>• Activation of personal and social resources</li> <li>• Mindfulness training</li> <li>• Empowerment</li> </ul> <hr/> <p>After lesson task: Recording of resources-related goals and ideas</p>                                                                                                                                            | <ul style="list-style-type: none"> <li>• Sports, exercise, and physical activity; dietary and insulin adaption to physical activity; cardiovascular training tasks</li> </ul>                                                                                                       |
| 5                           | <ul style="list-style-type: none"> <li>• Revision of main contents and results</li> <li>• Goal definition and agreement for following period</li> <li>• Motivational strategies</li> <li>• Prevention of relapse</li> <li>• Farewell</li> </ul> <hr/> <p>After lesson task: Recording of personal goals and time frames in DIAMOS booklet</p>                                                        | <ul style="list-style-type: none"> <li>• Social aspects of living with diabetes; work and driving law aspects; social support</li> <li>• Recommended reading, literature and online sources</li> <li>• Farewell</li> </ul>                                                          |

SUPPLEMENTARY DATA

**Supplementary Table 2. Changes in primary and secondary outcomes from baseline to follow-up stratified by DM type**

|                                                                        | DIAMOS<br>(n=93) | Control<br>(n=88) | Mean adjusted<br>between groups<br>baseline endpoint<br>change (95% CI) <sup>1</sup> | Differences between<br>DM types in mean<br>adjusted between<br>groups baseline<br>endpoint change<br>(95% CI) <sup>1</sup> | Interaction<br>group x DM<br>type |
|------------------------------------------------------------------------|------------------|-------------------|--------------------------------------------------------------------------------------|----------------------------------------------------------------------------------------------------------------------------|-----------------------------------|
| <b>Primary Outcome – Depressive Symptoms (CES-D score)<sup>2</sup></b> |                  |                   |                                                                                      |                                                                                                                            |                                   |
| CES-D score                                                            |                  |                   |                                                                                      |                                                                                                                            |                                   |
| Type 1 DM                                                              | 9.3 ±12.3        | 3.6 ±12.4         | 5.3 (3.0 to 7.6)                                                                     | Δ 0.9 (-3.9 to 5.6)                                                                                                        | .470                              |
| Type 2 DM                                                              | 4.9 ±9.5         | 0.4 ±10.0         | 4.4 (1.1 to 7.8)                                                                     |                                                                                                                            |                                   |
| <b>Secondary Outcomes – Psychological Variables<sup>2</sup></b>        |                  |                   |                                                                                      |                                                                                                                            |                                   |
| PHQ-9 score                                                            |                  |                   |                                                                                      |                                                                                                                            |                                   |
| Type 1 DM                                                              | 4.3 ±5.8         | 1.6 ±5.8          | 2.3 (1.3 to 3.4)                                                                     | Δ 0.2 (-1.9 to 2.3)                                                                                                        | .624                              |
| Type 2 DM                                                              | 2.0 ±3.7         | 0.2 ±5.2          | 2.1 (0.6 to 3.6)                                                                     |                                                                                                                            |                                   |
| WHO-5 score                                                            |                  |                   |                                                                                      |                                                                                                                            |                                   |
| Type 1 DM                                                              | -4.4 ±6.0        | -3.2 ±6.3         | -2.4 (-3.6 to -1.2)                                                                  | Δ 2.8 (0.3 to 5.2)                                                                                                         | .219                              |
| Type 2 DM                                                              | -4.6 ±6.3        | -0.8 ±6.3         | -5.2 (-7.0 to -3.5)                                                                  |                                                                                                                            |                                   |
| DDS score                                                              |                  |                   |                                                                                      |                                                                                                                            |                                   |
| Type 1 DM                                                              | 0.7 ±1.0         | 0.4 ±0.7          | 0.4 (0.3 to 0.6)                                                                     | Δ -0.2 (-0.5 to 0.1)                                                                                                       | .089                              |
| Type 2 DM                                                              | 0.7 ±1.0         | 0.3 ±0.8          | 0.6 (0.4 to 0.8)                                                                     |                                                                                                                            |                                   |
| PAID score                                                             |                  |                   |                                                                                      |                                                                                                                            |                                   |
| Type 1 DM                                                              | 16.0 ±17.9       | 4.9 ±14.7         | 8.0 (4.5 to 11.5)                                                                    | Δ -1.5 (-8.7 to 5.6)                                                                                                       | .656                              |
| Type 2 DM                                                              | 8.8 ±19.7        | 2.6 ±21.5         | 9.5 (4.4 to 14.6)                                                                    |                                                                                                                            |                                   |
| EQ-5D score                                                            |                  |                   |                                                                                      |                                                                                                                            |                                   |
| Type 1 DM                                                              | -0.00 ±0.21      | 0.00 ±0.20        | -0.01 (-0.05 to 0.03)                                                                | Δ -0.01 (-0.10 to 0.08)                                                                                                    | .861                              |
| Type 2 DM                                                              | -0.01 ±0.24      | -0.02 ±0.29       | 0.00 (-0.06 to 0.07)                                                                 |                                                                                                                            |                                   |
| AADQ score                                                             |                  |                   |                                                                                      |                                                                                                                            |                                   |
| Type 1 DM                                                              | -1.6 ±6.9        | -2.5 ±6.2         | -1.1 (-2.4 to 0.2)                                                                   | Δ 2.9 (0.2 to 5.6)                                                                                                         | .010                              |
| Type 2 DM                                                              | -3.8 ±8.6        | -0.8 ±7.3         | -4.0 (-5.9 to -2.0)                                                                  |                                                                                                                            |                                   |
| DTSQ score                                                             |                  |                   |                                                                                      |                                                                                                                            |                                   |
| Type 1 DM                                                              | -3.6 ±8.4        | -2.9 ±8.2         | -2.4 (-3.9 to -1.0)                                                                  | Δ 1.3 (-1.7 to 4.2)                                                                                                        | .940                              |
| Type 2 DM                                                              | -2.2 ±9.2        | -2.5 ±6.9         | -3.7 (-5.8 to -1.6)                                                                  |                                                                                                                            |                                   |
| SDSCA score                                                            |                  |                   |                                                                                      |                                                                                                                            |                                   |
| Type 1 DM                                                              | 0.1 ±1.1         | 0.1 ±1.0          | 0.0 (-0.2 to 0.2)                                                                    | Δ 0.0 (-0.4 to 0.4)                                                                                                        | .752                              |
| Type 2 DM                                                              | 0.1 ±1.1         | -0.1 ±1.2         | 0.0 (-0.3 to 0.3)                                                                    |                                                                                                                            |                                   |
| <b>Secondary Outcomes – Metabolic control<sup>2</sup></b>              |                  |                   |                                                                                      |                                                                                                                            |                                   |
| HbA1c (%)                                                              |                  |                   |                                                                                      |                                                                                                                            |                                   |
| Type 1 DM                                                              | 0.4 ±1.7         | 0.8 ±1.9          | 0.5 (0.2 to 0.9)                                                                     | Δ -0.2 (-0.8 to 0.4)                                                                                                       | .299                              |
| Type 2 DM                                                              | 0.7 ±2.3         | 0.7 ±1.3          | 0.7 (0.3 to 1.2)                                                                     |                                                                                                                            |                                   |
| <b>Secondary Outcomes – Inflammatory marker<sup>3</sup></b>            |                  |                   |                                                                                      |                                                                                                                            |                                   |
| hs-CRP (mg/dl)                                                         |                  |                   |                                                                                      |                                                                                                                            |                                   |
| Type 1 DM                                                              | -0.4 ±0.8        | -0.2 ±0.8         | -0.2 (-0.4 to 0.0)                                                                   | Δ -0.2 (-0.6 to 0.2)                                                                                                       | .123                              |
| Type 2 DM                                                              | -0.1 ±1.0        | 0.4 ±0.8          | 0.0 (-0.2 to 0.3)                                                                    |                                                                                                                            |                                   |
| IL-6 (pg/ml)                                                           |                  |                   |                                                                                      |                                                                                                                            |                                   |
| Type 1 DM                                                              | -0.0 ±0.7        | -0.1 ±0.6         | -0.1 (-0.2 to 0.1)                                                                   | Δ -0.2 (-0.5 to 0.2)                                                                                                       | .986                              |
| Type 2 DM                                                              | 0.1 ±0.8         | 0.1 ±0.5          | 0.1 (-0.1 to 0.3)                                                                    |                                                                                                                            |                                   |
| IL-1RA (pg/ml)                                                         |                  |                   |                                                                                      |                                                                                                                            |                                   |
| Type 1 DM                                                              | 0.1 ±0.3         | 0.1 ±0.4          | 0.2 (0.1 to 0.3)                                                                     | Δ 0.0 (-0.2 to 0.2)                                                                                                        | .428                              |
| Type 2 DM                                                              | 0.4 ±0.5         | 0.4 ±0.6          | 0.2 (0.1 to 0.3)                                                                     |                                                                                                                            |                                   |
| Adiponectin (ng/ml)                                                    |                  |                   |                                                                                      |                                                                                                                            |                                   |
| Type 1 DM                                                              | -0.1 ±0.4        | -0.1 ±0.3         | -0.1 (-0.2 to -0.1)                                                                  | Δ -0.2 (-0.4 to -0.1)                                                                                                      | .423                              |
| Type 2 DM                                                              | -0.0 ±0.4        | -0.0 ±0.3         | 0.1 (-0.0 to 0.2)                                                                    |                                                                                                                            |                                   |

<sup>1</sup> Values for between group differences in baseline-endpoint-changes and values for differences between DM types in between group baseline-endpoint-changes are adjusted for BMI, macrovascular complications, baseline CES-D, baseline PHQ-9 and baseline values.

## SUPPLEMENTARY DATA

- <sup>2</sup> Values for within group baseline-endpoint-changes (means  $\pm$ SEM) are adjusted for BMI, macrovascular complications, baseline CES-D, baseline PHQ-9 and baseline values.
- <sup>3</sup> Values for within group baseline-endpoint-changes for inflammatory markers (means  $\pm$ SEM) are adjusted for age, sex, BMI, diabetes duration, micro- and macrovascular complications, intake of medications (statins, anticoagulants, thyroid medication, cortisone, and non-steroidal anti-inflammatory drugs [NSAID]), baseline CES-D, baseline PHQ-9 and baseline values.
